# Supplementary material for: Status of Ecosystem Services in Abandoned Mining Areas in the Iberian Peninsula: Management Proposal
Source: MDPI journal article supplement (doi:10.3390/toxics11030275), 2023-03-17
Supplement: s1 [file s1]

# **Status of Ecosystem Services in Abandoned Mining Areas in the Iberian Peninsula: Management Proposal**

**María González-Morales, M<sup>a</sup> Ángeles Rodríguez-González and Luis Fernández-Pozo \***

Environmental Resources Analysis (ARAM) Research Group, University of Extremadura, 06006 Badajoz, Spain

\* Correspondence: [luferpo@unex.es](mailto:luferpo@unex.es)

## **Contents of this file**

### **1. Figures**

**Figure S1.** Mining tailing platform.

**Figure S2.** Mining tailing.

**Figure S3.** Buildings.

**Figure S4.** Dump.

**Figure S5.** Rotated component chart.

### **2. Tables**

**Table S1.** Diseases and/or disorders caused by metal(loid)s in humans.

**Table S2.** Soil analysis.

**Table S3.** Correlation matrix.

**Table S4.** Component matrix.

**Table S5.** Component matrix rotated.

## 1. Figures

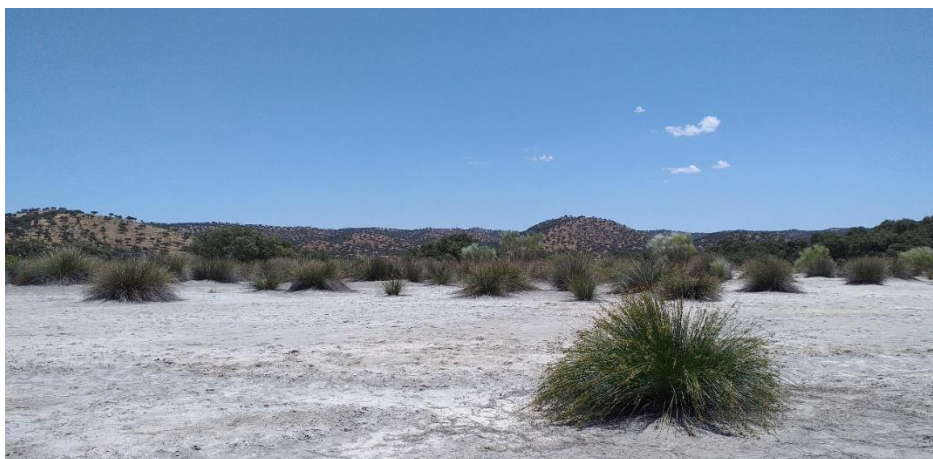

**Figure S1.** Mining sludge platform.

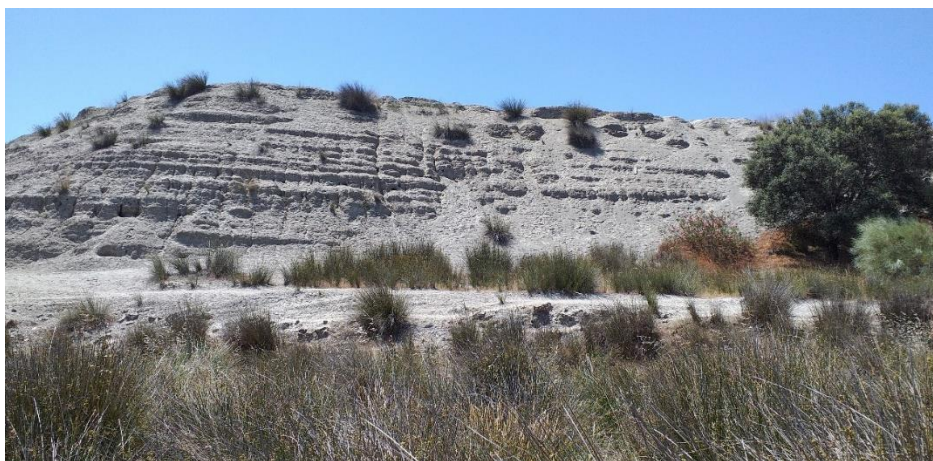

**Figure S2.** Mining sludge.

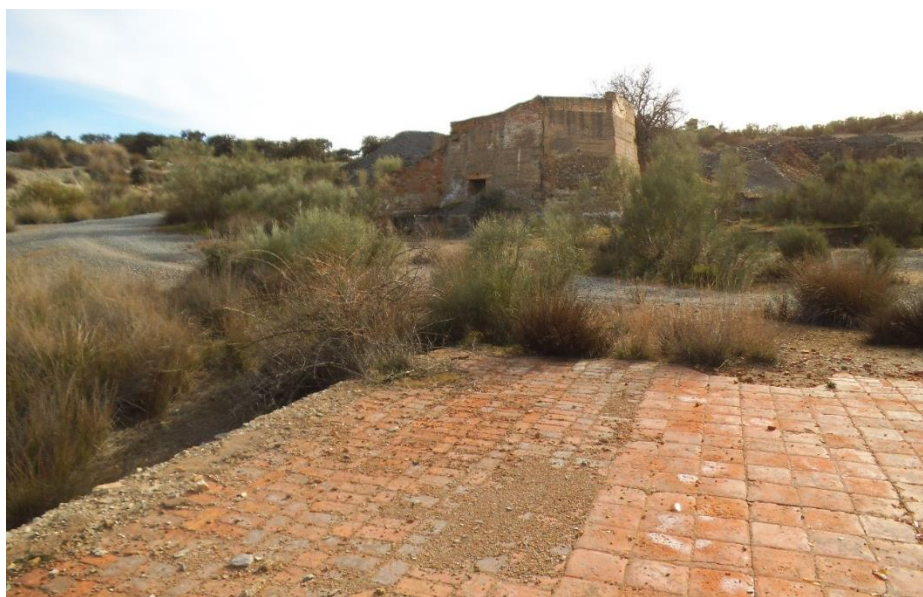

**Figure S3.** Buildings.

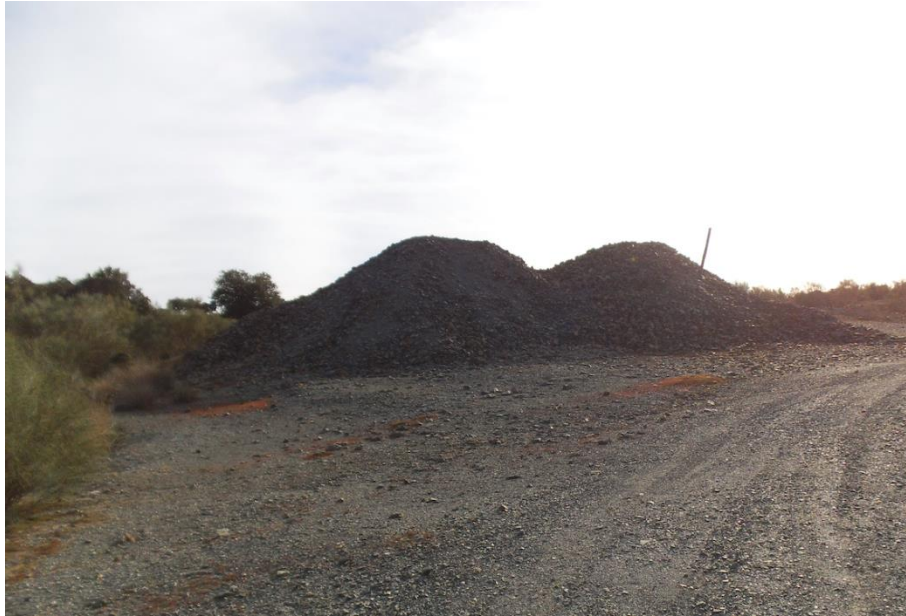

**Figure S4.** Dump.

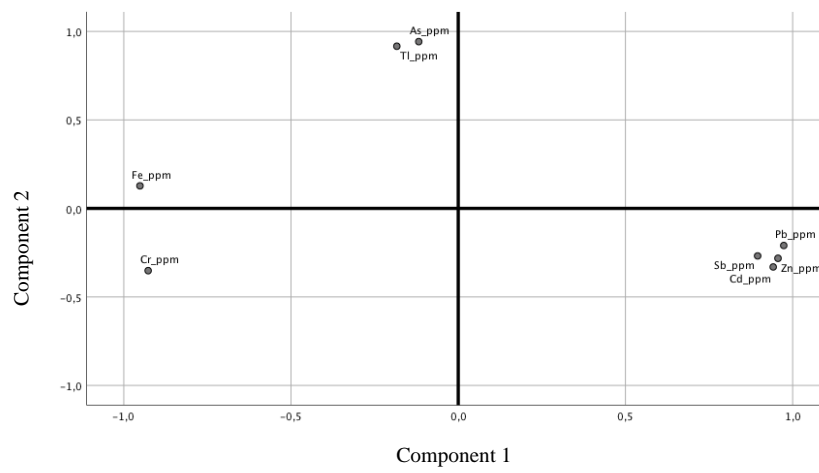

**Figure S5.** Rotated component chart.

## 2. Tables

**Table S1.** Diseases and/or disorders caused by metal(loid)s in humans.

| Metal(loid) | Diseases/Disorders                                                                                                | References |
|-------------|-------------------------------------------------------------------------------------------------------------------|------------|
| As          | Cardiovascular and respiratory diseases, tumor processes, immune dysfunction, liver disorders.                    | [16]       |
| Cd          | Respiratory, gastrointestinal diseases, kidney and bone disorders, potentially tumorous.                          | [17]       |
| Co          | Cardiovascular, pulmonary, endocrine, neurological, potentially tumor diseases.                                   | [18]       |
| Cr          | Digestive tract ulceration, allergic reactions, tumor processes.                                                  | [19]       |
| Hg          | It affects the nervous system, respiratory diseases, cardiac and gastric alterations.                             | [20]       |
| Ni          | Epithelial irritations and inflammations, pulmonary, haematological, renal and gastric diseases, tumor processes. | [21]       |
| Pb          | Haematological, neuronal, skeletal diseases, development in children, tumor processes.                            | [22]       |
| Sb          | Respiratory, cardiovascular and/or gastrointestinal diseases.                                                     | [23]       |
| Se          | Respiratory, cardiovascular, gastrointestinal and/or motor diseases.                                              | [24]       |
| Tl          | Affects lungs, kidneys, heart, liver, reproductive disorders and nervous system.                                  | [25]       |
| Zn          | Respiratory problems, digestive tract disorders, behavioural disturbances; tumor processes.                       | [26]       |

**Table S2.** Soil analysis.

|           | Eh<br>(mV) | Ca<br>(Cmol/kg) | Mg<br>(Cmol/kg) | Na<br>(Cmol/kg) | K<br>(Cmol/kg) | Arena<br>(%) | Arcilla<br>(%) | Limo<br>(%) |
|-----------|------------|-----------------|-----------------|-----------------|----------------|--------------|----------------|-------------|
| Mining    | 318.2      | 2.33            | 0.71            | 0.22            | 0.21           | 35.21        | 7.54           | 57.25       |
| sludge    | ±7.7       | ±0.71           | ±0.36           | ±0.9            | ±0.04          | ±12.07       | ±1.77          | ±10.53      |
| Shrubland | 326.9      | 4.60            | 1.12            | 0.17            | 0.26           | 47.36        | 7.53           | 45.11       |
|           | ±4.9       | ±1.44           | ±0.46           | ±0.07           | ±0.09          | ±4.66        | ±1.35          | ±4.36       |
| Riparian  | 303.8      | 6.57            | 1.80±           | 0.17            | 0.31           | 55.97        | 4.96           | 39.07       |
|           | ±47.0      | ±2.38           | 0.82            | ±0.07           | ±0.13          | ±11.69       | ±2.12          | ±10.65      |
| Dehesa    | 340.2      | 5.62            | 1.63            | 0.20            | 0.27           | 56.49        | 7.85           | 35.66       |
|           | ±61.5      | ±2.01           | ±0.76           | ±0.09           | ±0.12          | ±8.94        | ±2.13          | ±9.44       |
| Control   | 220.1      | 9.26            | 2.79            | 0.09            | 0.15           | 73.95        | 8.75           | 17.30       |
|           | ±32.5      | ±1.39           | ±0.68           | ±0.01           | ±0.03          | ±1.89        | ±0.65          | ±1.16       |

**Table S3.** Correlation matrix <sup>a,b</sup>

|    | As    | Pb    | Sb    | Tl    | Zn    | Cr    | Fe    | Cd    |
|----|-------|-------|-------|-------|-------|-------|-------|-------|
| As | 1,000 | -,340 | -,404 | ,781  | -,363 | -,210 | ,166  | -,431 |
| Pb | -,340 | 1,000 | ,949  | -,338 | ,983  | -,829 | -,929 | ,990  |
| Sb | -,404 | ,949  | 1,000 | -,321 | ,904  | -,701 | -,797 | ,953  |
| Tl | ,781  | -,338 | -,321 | 1,000 | -,458 | -,149 | ,385  | -,461 |
| Zn | -,363 | ,983  | ,904  | -,458 | 1,000 | -,793 | -,968 | ,989  |
| Cr | -,210 | -,829 | -,701 | -,149 | -,793 | 1,000 | ,851  | -,751 |
| Fe | ,166  | -,929 | -,797 | ,385  | -,968 | ,851  | 1,000 | ,923  |
| Cd | -,431 | ,990  | ,953  | ,461  | ,989  | ,751  | ,923  | 1,000 |

a. Determinant = ,000

b. This matrix is not certain positive

**Table S4.** Component matrix <sup>a</sup>

|           | Component |       |
|-----------|-----------|-------|
|           | 1         | 2     |
| <b>Cd</b> | ,998      |       |
| <b>Zn</b> | ,997      |       |
| <b>Pb</b> | ,992      |       |
| <b>Fe</b> | -,947     | -,161 |
| <b>Sb</b> | ,934      |       |
| <b>Cr</b> | -,781     | -,611 |
| <b>As</b> | -,393     | ,865  |
| <b>Tl</b> | -,448     | ,820  |

Extraction method: Principal Component Analysis

a. 2 components extracted.

**Table S5.** Component matrix rotated.

|           | Component |       |
|-----------|-----------|-------|
|           | 1         | 2     |
| <b>Pb</b> | ,973      | -,210 |
| <b>Zn</b> | ,956      | -,282 |
| <b>Fe</b> | -,952     | ,128  |
| <b>Cd</b> | ,942      | -,331 |
| <b>Cr</b> | -,927     | -,351 |
| <b>Sb</b> | ,895      | -,268 |
| <b>As</b> | -,118     | ,942  |
| <b>Tl</b> | -,184     | ,916  |

Extraction method: Principal Component Analysis

Rotation method: Varimax with Kaiser normalization

a. The rotation converged in 3 iterations.
